# Supplementary material for: Targeted mutation detection in breast cancer using MammaSeq™
Source: PubMed Central journal article supplement (PMC6368740; doi:10.1186/s13058-019-1102-7), 2019-02-08
Supplement: 13058_2019_1102_MOESM1_ESM.pdf [file 13058_2019_1102_MOESM1_ESM.pdf]

Table S1. Clinical characteristics, treatment, and outcome data for all patients.

| Patient ID for manuscript | Age at Diagnosis | Race 1-Desc | Histo/Behavior ICD-O-3-Desc | Grade/Differentiation | Size of Tumor | Clinical T | Clinical N | Clinical M | Clinical Stage Group | Pathologic T | Pathologic N | Pathologic M | Pathologic Stage Group | ER  | PR  | HER2 | Vital Status-Desc | Disease-Free Survival | Months from Dx to 1st Recur | Survival |
|---------------------------|------------------|-------------|-----------------------------|-----------------------|---------------|------------|------------|------------|----------------------|--------------|--------------|--------------|------------------------|-----|-----|------|-------------------|-----------------------|-----------------------------|----------|
| PR02                      | 43               | White       | IDC                         | 3                     | N/A           | N/A        | N/A        | N/A        | N/A                  | N/A          | N/A          | N/A          | N/A                    | -   | -   | -    | N/A               | N/A                   | N/A                         | N/A      |
| PR11                      | 42               | Black       | IDC/ILC                     | 3                     | 72            | c3         | c0         | c0         | 2B                   | p1C          | p0           | N/A          | 1A                     | -   | -   | -    | Dead              | 15                    | 17                          | 22       |
| PR14                      | 41               | White       | IDC                         | 3                     | 17            | c1C        | c0         | c0         | 1A                   | p1C          | p1           | N/A          | 2A                     | +   | +   | -    | Dead              | 19                    | 19                          | 46       |
| PR19                      | 49               | White       | IDC                         | N/A                   | N/A           | N/A        | N/A        | N/A        | N/A                  | N/A          | N/A          | N/A          | N/A                    | -   | -   | -    | Dead              | 0                     | 0                           | 0        |
| PR24                      | 51               | White       | IDC                         | 3                     | 70            | c2         | c1         | c0         | 2B                   | p4           | p3A          | N/A          | 3C                     | +   | +   | +    | Dead              | 0                     | 0                           | 47       |
| PR26                      | 54               | White       | IDC                         | N/A                   | N/A           | N/A        | N/A        | N/A        | N/A                  | N/A          | N/A          | N/A          | N/A                    | +   | +   | -    | Dead              | 0                     | 0                           | 0        |
| PR31                      | 54               | White       | IDC                         | 3                     | 42            | c2         | c1         | c0         | 2A                   | p1B          | p1A          | N/A          | 2A                     | +   | +   | -    | Dead              | 15                    | 15                          | 37       |
| PR39                      | 64               | White       | IDC                         | 2                     | 60            | c1C        | c1         | c0         | 2A                   | p3           | p2A          | N/A          | 3A                     | +   | +   | +    | Alive             | 3                     | 5                           | 54       |
| PR43                      | 65               | White       | IDC                         | 2                     | 31            | c2         | c0         | c0         | 2B                   | p2           | p2A          | N/A          | 3A                     | +   | +   | -    | Dead              | 12                    | 14                          | 36       |
| PR48                      | 70               | White       | IDC                         | 3                     | N/A           | N/A        | N/A        | N/A        | N/A                  | p4A          | p2A          | c0           | 3B                     | +   | +   | -    | Dead              | 7                     | 7                           | 47       |
| MET01                     | 30               | White       | IDC                         | 3                     | 046           | c2         | c1         | c0         | 2B                   | p2           | p3A          | N/A          | 3C                     | -   | -   | -    | Dead              | 16                    | 16                          | 26       |
| MET03                     | 39               | White       | N/A                         | 4                     | N/A           | c4D        | c0         | c0         | 3B                   | pIS          | p0           | c0           | 0                      | -   | -   | +    | Alive             | 92                    | 92                          | 127      |
| MET05                     | 32               | White       | IDC                         | 3                     | 065           | c3         | c3         | c0         | 3C                   | p3           | p3           | N/A          | 3C                     | -   | -   | -    | Dead              | 8                     | 8                           | 40       |
| MET06                     | 31               | White       | IDC                         | 3                     | 38            | c2         | c1A        | c0         | 2B                   | p1B          | p1A          | c0           | 1                      | +   | -   | -    | Dead              | 13                    | 13                          | 66       |
| MET07                     | 36               | White       | IDC                         | 3                     | 33            | c2         | c0         | c1         | 4                    | p1C          | p1A          | p1           | 4                      | +   | -   | -    | Dead              | 0                     | 0                           | 55       |
| MET08                     | 36               | White       | IDC                         | 2                     | 31            | c2         | c0         | c0         | 2A                   | p2           | p2A          |              | 3A                     | +   | +   | -    | Dead              | 32                    | 33                          | 61       |
| MET09                     | 38               | White       | IDC                         | 3                     | 80            | c3         | c1         | c0         | 3A                   | pIS          | p0           |              | 0                      | -   | -   | -    | Dead              | 15                    | 15                          | 20       |
| MET10                     | 37               | White       | IDC                         | 9                     | 10            | c1         | c1         | c0         | 2A                   | p1           | p1           |              | 2A                     | +   | -   | -    | Dead              | 52                    | 52                          | 67       |
| MET12                     | 42               | White       | IDC                         | 3                     | 20            | c1C        | c1         | c0         | 2B                   | p1B          | p0           |              | 1A                     | -   | -   | -    | Dead              | 12                    | 13                          | 42       |
| MET13                     | 42               | White       | IDC                         | 3                     | 61            | c3         | c1         | c0         | 3A                   | p2           | p2A          |              | 3A                     | -   | -   | -    | Dead              | 20                    | 21                          | 29       |
| MET15                     | -                | White       | N/A                         | 9                     | 999           |            |            |            |                      |              |              |              | N/A                    | -   | -   | -    | Dead              | 0                     | 0                           | 0        |
| MET16                     | 37               | White       | ILC                         | 2                     | 100           | c3         | c1         | c0         | 3A                   | p1           | p2A          |              | 3A                     | +   | -   | -    | Dead              | 82                    | 84                          | 138      |
| MET17                     | -                | White       | IDC                         | 9                     | 999           |            |            |            |                      |              |              |              | N/A                    | N/A | N/A | N/A  | Alive             | 0                     | 0                           | 0        |
| MET18                     | 45               | White       | IDC                         | 3                     | 120           | c3         | c2         | c1         | 4                    | p3           | p1A          | p1           | 4                      | -   | -   | -    | Dead              | 0                     | 0                           | 25       |
| MET20                     | 47               | White       | ILC                         | 3                     | 58            | c3         | c1         | c1         | 4                    | pX           | pX           |              | N/A                    | +   | +   | -    | Dead              | 0                     | 0                           | 25       |
| MET21                     | 35               | White       | IDC                         | 3                     | 13            | c1         | c0         | c0         | 1                    | p1C          | p0           | c0           | 1                      | +   | +   | +    | Alive             | 32                    | 33                          | 221      |
| MET22                     | 36               | White       | N/A                         | 9                     | 13            | cX         | cX         | c0         | 99                   | p1C          | p0           |              | 1                      | -   | -   | -    | Dead              | 84                    | 84                          | 181      |
| MET23                     | 47               | White       | IDC/ILC                     | 3                     | 35            | c2         | c1         | c0         | 2B                   | p1B          | p0           |              | 1A                     | -   | -   | -    | Dead              | 25                    | 25                          | 63       |
| MET25                     | 42               | White       | IDC/ILC                     | 2                     | 50            | c1         | c0         | c0         | 1                    | p2           | p1           | c0           | 2B                     | +   | +   | -    | Dead              | 123                   | 125                         | 163      |
| MET27                     | 49               | White       | IDC/ILC                     | 3                     | 90            | c3         | c1         | c0         | 3A                   | p2           | p3           | c0           | 3C                     | +   | +   | -    | Dead              | 28                    | 28                          | 68       |
| MET28                     | 38               | White       | IDC                         | 9                     | 14            | c1         | c0         | c0         | 1                    | p1C          | pX           | c0           | N/A                    | +   | +   | +    | Dead              | 63                    | 64                          | 213      |
| MET29                     | 54               | White       | IDC                         | 3                     | 999           | c4B        | c1         |            | 3B                   | pX           | pX           |              | N/A                    | -   | -   | -    | Dead              | 0                     | 0                           | 18       |
| MET30                     | 45               | White       | IDC                         | 9                     | 60            | c3         | c1         | c0         | 3A                   | p1C          | p1           | c0           | 2A                     | +   | +   | -    | Dead              | 87                    | 88                          | 146      |
| MET32                     | 54               | White       | IDC                         | 3                     | 34            | c2         | c1         | c1         | 4                    | p2           | p0           | p1           | 4                      | +   | +   | -    | Alive             | 0                     | 0                           | 68       |
| MET33                     | 31               | White       | IDC                         | 9                     | 999           | c1         | c0         | c0         | 1                    | p1           | p0           |              | 1                      | +   | -   | +    | Dead              | 274                   | 274                         | 348      |
| MET34                     | 45               | White       | IDC                         | 2                     | 030           | c2         | c1         | c0         | 2B                   | p2           | p0           | c0           | 2A                     | N/A | N/A | N/A  | Dead              | 42                    | 43                          | 201      |
| MET35                     | 48               | White       | ILC                         | 9                     | 120           | c4B        | c1         | c0         | 3B                   | p3           | p1           | c0           | 3A                     | +   | +   | -    | Dead              | 135                   | 136                         | 170      |
| MET36                     | 58               | White       | IDC                         | 3                     | 23            | c2         | c0         | c0         | 2A                   | pX           | pX           |              | N/A                    | -   | -   | -    | Dead              | 15                    | 16                          | 41       |
| MET37                     | 60               | White       | IDC                         | 9                     | 30            | c2         | cX         | c1         | 4                    | p2           | p3A          | p1           | 4                      | -   | +   | -    | Dead              | 0                     | 0                           | 26       |
| MET38                     | 45               | White       | ILC                         | 9                     | 42            | c2         | c0         | c0         | 2A                   | p2           | p1B          | c0           | 2B                     | +   | -   | -    | Dead              | 198                   | 198                         | 226      |
| MET40                     | 57               | White       | IDC                         | 2                     | 28            | cX         | cX         | cX         | 99                   | p2           | p1A          | c0           | 2B                     | -   | -   | -    | Dead              | 86                    | 86                          | 93       |
| MET41                     | 67               | White       | ILC                         | 9                     | 2             | c1A        | c0         | c1         | 4                    | pX           | pX           |              | N/A                    | +   | N/A | N/A  | Alive             | 0                     | 0                           | 34       |
| MET44                     | -                | White       | N/A                         | 9                     | 999           |            |            |            |                      |              |              |              | N/A                    | -   | -   | -    | Dead              | 0                     | 0                           | 0        |
| MET46                     | 68               | White       | IDC                         | 2                     | 18            | c1C        | c0         | c0         | 1A                   | p1C          | p0           |              | 1A                     | +   | -   | -    | Alive             | 4                     | 6                           | 40       |
| MET47                     | 69               | White       | IDC                         | 3                     | 12            | cX         | c0         | c0         | 99                   | p1C          | p0           |              | 1A                     | -   | -   | -    | Alive             | 19                    | 19                          | 22       |
| MET49                     | 71               | White       | IDC                         | 3                     | 19            | c2         | c0         | c0         | 2A                   | p1C          | p0           |              | 1A                     | +   | +   | -    | Dead              | 44                    | 44                          | 51       |
| CF15                      | 24               | white       | IDC                         | 2                     | 997           | 3          | 1          | 0          | 3A                   | 1A           | 1            | 0            | 2A                     | +   | +   | N/A  | 1                 | 79                    | 79                          | 138      |
| CF20                      | 53               | white       | IDC                         | 3                     | 074           | 3          | 1          | 0          | 3A                   | 2            | 1A           | 0            | 2B                     | +   | +   | N/A  | 1                 | 64                    | 64                          | 96       |
| CF22                      | 34               | white       | IDC                         | 2                     | 025           | N/A        | N/A        | N/A        | 99                   | N/A          | N/A          | N/A          | 99                     | +   | +   | N/A  | 1                 | 0                     | 0                           | 0        |
| CF23                      | 54               | white       | IDC                         | 3                     | 034           | 2          | 1          | 1          | 4                    | 2            | 0            | 1            | 4                      | +   | N/A | N/A  | 1                 | 0                     | 0                           | 40       |
| CF26                      | 62               | white       | IDC                         | 9                     | 013           | 1C         | 3          | 0          | 3B                   | X            | X            | X            | 99                     | +   | N/A | N/A  | 1                 | 151                   | 152                         | 224      |
| CF27                      | 42               | white       | IDC                         | 3                     | 074           | 3          | 3          | 1          | 4                    | 1C           | 3            | 1            | 4                      | +   | +   | N/A  | 0                 | 0                     | 0                           | 80       |
| CF28                      | 55               | white       | IDC                         | 2                     | 018           | 1C         | 0          | 0          | 1                    | 1C           | 1M           | 0            | 2A                     | +   | +   | N/A  | 1                 | 116                   | 117                         | 124      |
