# Supplementary material for: Targeted mutation detection in breast cancer using MammaSeq™
Source: PubMed Central journal article supplement (PMC6368740; doi:10.1186/s13058-019-1102-7), 2019-02-08
Supplement: 13058_2019_1102_MOESM3_ESM.pdf [file 13058_2019_1102_MOESM3_ESM.pdf]

**Table S2. Sequence of primers for preamplification.**

| <b>Mutation</b> | <b>Forward primer</b> | <b>Reverse primer</b> |
|-----------------|-----------------------|-----------------------|
| ESR1-<br>D538G  | GCATGAAGTGCAAGAACGTG  | AAGTGGCTTTGGTCCGTCT   |
| FOXA1-<br>Y175C | TGGATGGCCATGGTGATGAG  | AGACGTTCAAGCGCAGCTA   |
