# Supplementary material for: Targeted mutation detection in breast cancer using MammaSeq™
Source: PubMed Central journal article supplement (PMC6368740; doi:10.1186/s13058-019-1102-7), 2019-02-08

# Supplemental Figure 4

## Mutations Per Solid Tumor Sample

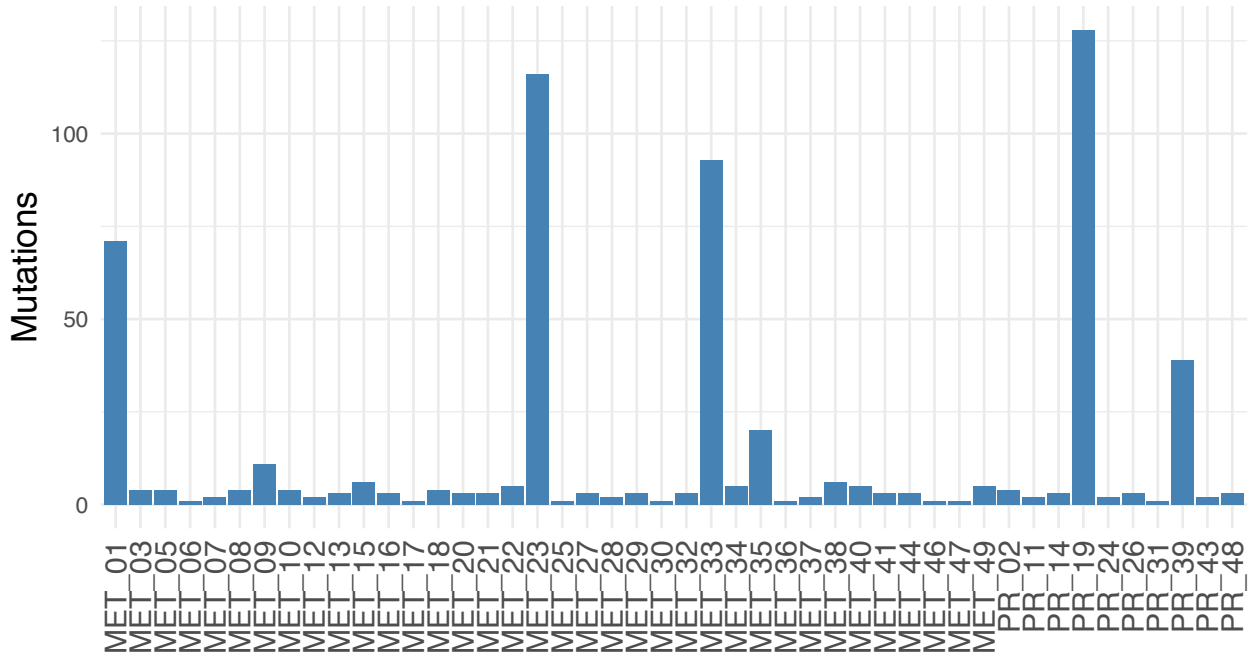

Supplement: 13058_2019_1102_MOESM9_ESM.pdf [file 13058_2019_1102_MOESM9_ESM.pdf]
