# Supplementary material for: Targeted mutation detection in breast cancer using MammaSeq™
Source: Springer Nature journal article supplement (doi:10.1186/s13058-019-1102-7), 2019-02-08
Supplement: MOESM4 [file 16460250]

**Table S3. Sequence of ddPCR primers and probes.**

| <b>Mutation</b> | <b>Forward primer</b>    | <b>Reverse primer</b>   | <b>Mutant Probe</b>           | <b>WT probe</b>               | <b>Fluorescence</b> |
|-----------------|--------------------------|-------------------------|-------------------------------|-------------------------------|---------------------|
| ESR1-D538G      | GCATGAAGTGCAAGAAC<br>GTG | AAGTGGCTTTGGTCCGT<br>CT | TCTATGGCCTGCTGCTG<br>GAGATGCT | TCTATGACCTGCTGCTGG<br>AGATGCT | HEX/FAM             |
| FOXA1-Y175C     | TGGATGGCCATGGTGAT<br>GAG | AGACGTTCAAGCGCAGC<br>TA | CTACTCGTGCATCTCG              | CCTACTCGTACATCTCG             | FAM/VIC             |
