# Supplementary material for: Targeted mutation detection in breast cancer using MammaSeq™
Source: Springer Nature journal article supplement (doi:10.1186/s13058-019-1102-7), 2019-02-08

**Figure S3**

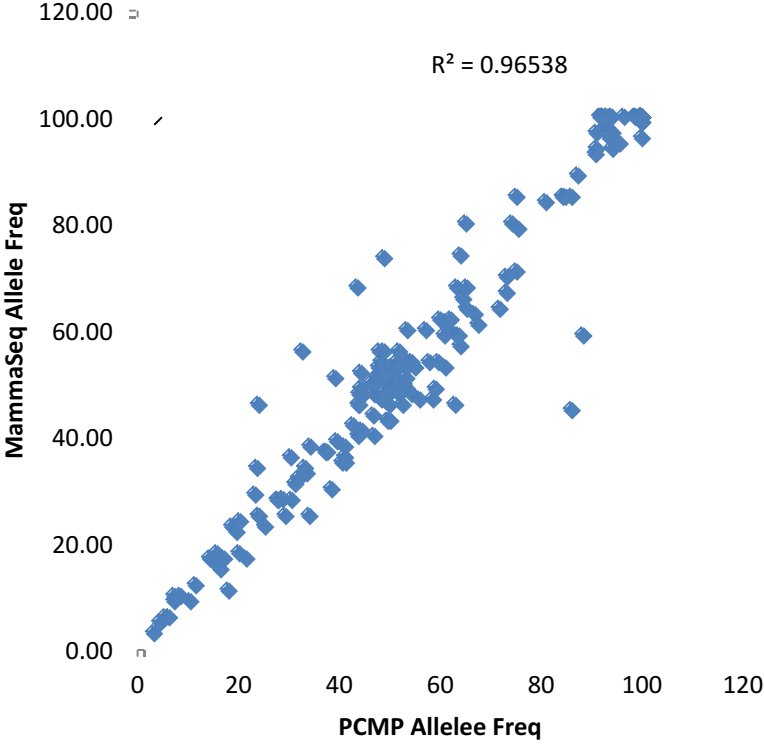

Supplement: MOESM8 [file 16460250]
