# Supplementary material for: Targeted mutation detection in breast cancer using MammaSeq™
Source: Springer Nature journal article supplement (doi:10.1186/s13058-019-1102-7), 2019-02-08

**Figure S5**

**A**

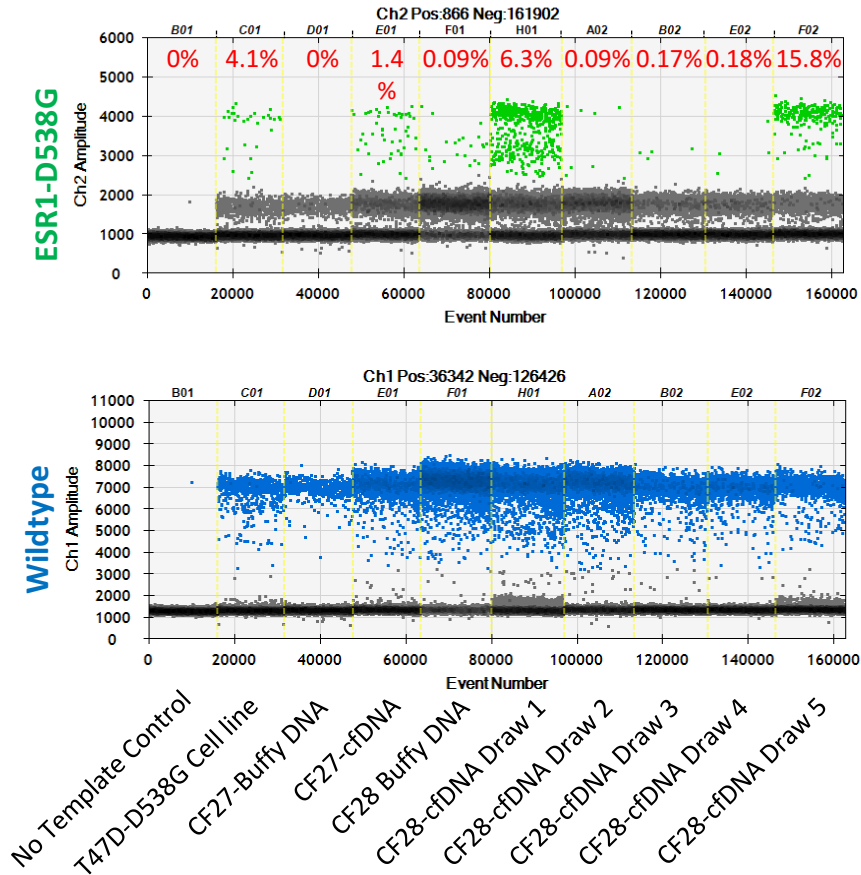

**B**

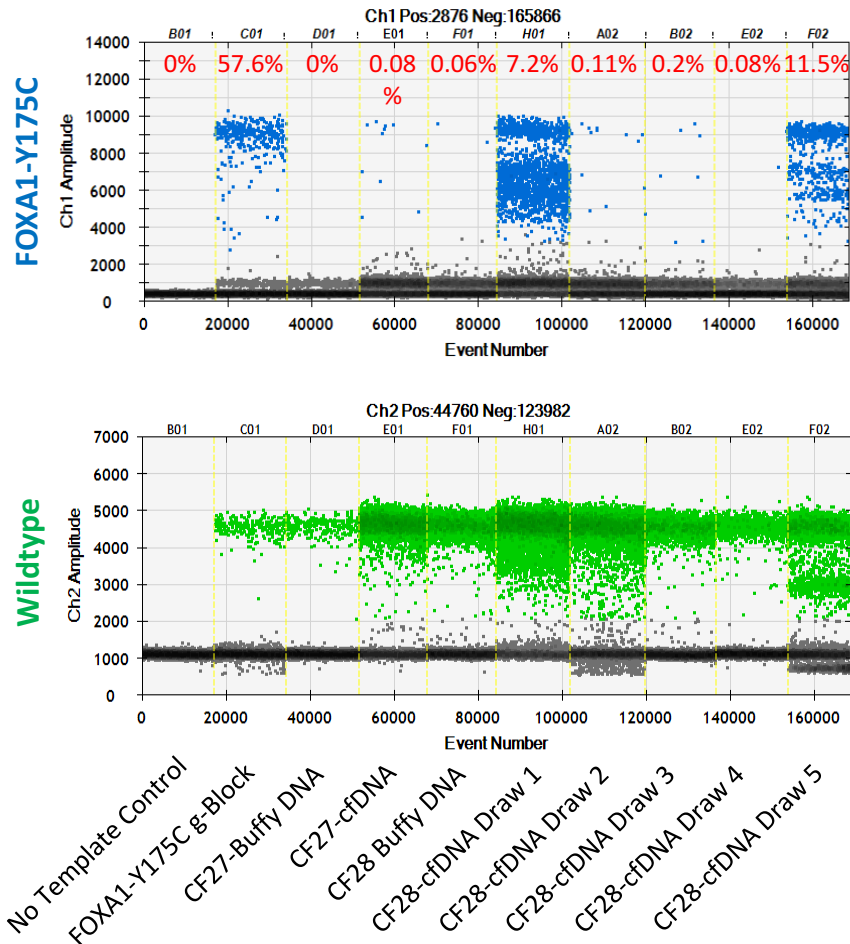

C

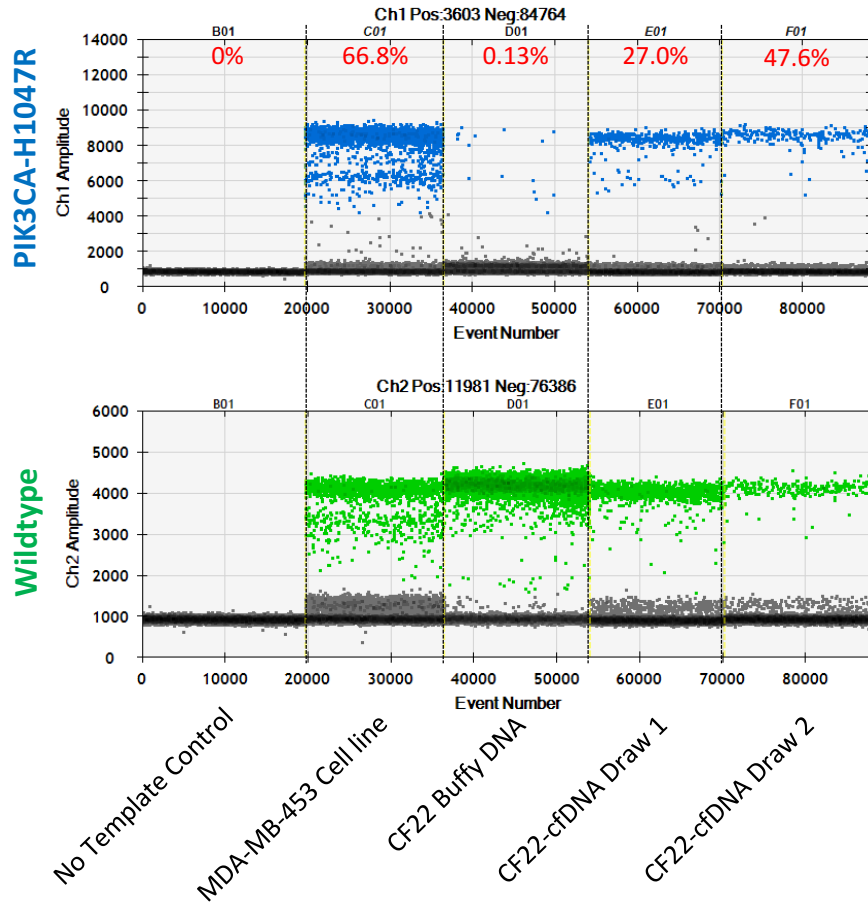

Supplement: MOESM11 [file 16460250]
