# Supplementary material for: Targeted mutation detection in breast cancer using MammaSeq™
Source: Breast Cancer Res. 2019 Feb 8;21:22. doi: 10.1186/s13058-019-1102-7 (PMC6368740; doi:10.1186/s13058-019-1102-7)
Supplement: Supplementary file 2 — Data file 1 Genomic location of mutations in MammaSeq panel. (XLSX 113 kb) [file 13058_2019_1102_MOESM2_ESM.xlsx]

## Sheet: Sheet1
Gene	Chromosome	Start	End	Amino Acid Change
ABL1	9	133729581	133729582	p.D90N
ABL1	9	133738329	133738330	p.M244V
ABL1	9	133738341	133738342	p.L248V
ABL1	9	133738348	133738349	p.G250E
ABL1	9	133738355	133738356	p.Q252H
ABL1	9	133738355	133738356	p.Q252H
ABL1	9	133738356	133738357	p.Y253H
ABL1	9	133738357	133738358	p.Y253F
ABL1	9	133738362	133738363	p.E255K
ABL1	9	133738363	133738364	p.E255V
ABL1	9	133747519	133747520	p.D276G
ABL1	9	133748282	133748283	p.T315I
ABL1	9	133748287	133748288	p.F317L
ABL1	9	133748289	133748290	p.F317L
ABL1	9	133748390	133748391	p.M351T
ABL1	9	133748402	133748403	p.E355G
ABL1	9	133748413	133748414	p.F359V
ABL1	9	133750318	133750319	p.L384M
ABL1	9	133750327	133750328	p.L387M
ABL1	9	133750355	133750356	p.H396R
ABL1	9	133750395	133750396	p.E409D
ABL1	9	133753848	133753849	p.Y459H
ABL1	9	133755476	133755477	p.D501E
ABL1	9	133759841	133759846	p.V741fs
AKT1	14	105241443	105241444	p.K179M
AKT1	14	105241462	105241463	p.G173R
AKT1	14	105238713	105238714	p.V416
AKT1	14	105246444	105246445	p.L52R
AKT1	14	105246550	105246551	p.E17K
AKT3	1	243716069	243716070	p.S375*
AKT3	1	243727041	243727042	p.P310A
AKT3	1	243727149	243727150	p.L274
AKT3	1	243800978	243800979	p.R166*
AKT3	1	243801041	243801042	p.M145V
AKT3	1	243828107	243828108	p.E84K
AKT3	1	243828161	243828162	p.R66*
ALK	2	29416320	29416321	p.N1544
ALK	2	29416670	29416671	p.Q1428*
ALK	2	29430079	29430080	p.E1299K
ALK	2	29432664	29432665	p.R1275*
ALK	2	29443630	29443631	p.L1196M
ALK	2	29443694	29443695	p.F1174L
ALK	2	29455274	29455275	p.G843R
ALK	2	29456513	29456514	p.E802K
ALK	2	29917809	29917810	p.Q286
AR	X	66765049	66765050	p.G21A
AR	X	66765080	66765081	p.R31
AR	X	66765160	66765161	p.Q58L
AR	X	66765450	66765451	p.E155K
AR	X	66766553	66766554	p.S522
AR	X	66863183	66863184	p.S568F
AR	X	66931269	66931270	p.L638M
AR	X	66931345	66931346	p.S663*
AR	X	66931463	66931464	p.L702H
AR	X	66941796	66941797	p.F814V
AR	X	66942813	66942814	p.D865E
AR	X	66943552	66943553	p.T878A
ARID1A	1	27059263	27059264	p.S634*
ARID1A	1	27099396	27099397	p.Q1212*
ARID1A	1	27099947	27099948	p.R1276*
ARID1A	1	27100207	27100208	p.R1335*
ARID1A	1	27101054	27101055	p.R1446*
ARID1A	1	27105554	27105555	p.R1722L
ARID1A	1	27106354	27106355	p.R1989*
ARID1A	1	27106649	27106650	p.G2087E
ARID1A	1	27106862	27106863	p.R2158Q
ATM	11	108098604	108098605	p.A59S
ATM	11	108106471	108106472	p.Y137fs
ATM	11	108117797	108117798	p.R337C
ATM	11	108117797	108117798	p.R337S
ATM	11	108117846	108117848	p.C353fs*5
ATM	11	108119727	108119728	p.S378R
ATM	11	108119822	108119823	p.V410A
ATM	11	108121487	108121488	p.L432
ATM	11	108123550	108123551	p.P604S
ATM	11	108124565	108124566	p.E642K
ATM	11	108124586	108124587	p.E649Q
ATM	11	108126951	108126952	p.S712*
ATM	11	108129722	108129723	p.N796T
ATM	11	108137972	108137973	p.E848Q
ATM	11	108138002	108138003	p.F858L
ATM	11	108155131	108155132	p.A1309T
ATM	11	108164149	108164151	p.R1575fs
ATM	11	108164151	108164152	p.R1575L
ATM	11	108170475	108170476	p.I1681V
ATM	11	108170478	108170479	p.D1682Y
ATM	11	108170511	108170512	p.D1693N
ATM	11	108172420	108172421	p.A1742P
ATM	11	108173639	108173640	p.L1794L
ATM	11	108175470	108175471	p.E1856*
ATM	11	108180944	108180945	p.V1941L
ATM	11	108192064	108192065	p.E2164K
ATM	11	108196268	108196269	p.Q2269*
ATM	11	108200960	108200961	p.R2443Q
ATM	11	108200997	108200998	p.L2455
ATM	11	108204680	108204681	p.T2666A
ATM	11	108205768	108205769	p.G2695A
ATM	11	108206577	108206578	p.D2720N
ATM	11	108214018	108214019	p.L2780R
ATM	11	108218044	108218045	p.N2875S
ATM	11	108218088	108218089	p.L2890V
ATM	11	108225589	108225590	p.T2947S
ATM	11	108235934	108235935	p.R2993*
ATM	11	108236085	108236086	p.R3008C
ATM	11	108236202	108236203	p.R3047*
AURKA	20	56370288	56370289	p.S361*
AURKA	20	56373468	56373469	p.G265E
AURKA	20	56373526	56373527	p.Y246H
AURKA	20	54958144	54958145	p.S155G
AURKA	20	54961389	54961390	p.A81V
AURKA	20	54961417	54961418	p.Q72*
AURKA	20	54961552	54961553	p.V27M
AURKB	17	8111119	8111120	p.R30W
AURKB	17	8110596	8110597	p.S99N
AURKB	17	8110508	8110509	p.I128T
AURKB	17	8108653	8108654	p.R248C
AURKB	17	8108544	8108545	p.R284H
AURKB	17	8108286	8108287	p.S313L
BRAF	7	140439645	140439646	p.K698R
BRAF	7	140453111	140453112	p.H608R
BRAF	7	140453117	140453118	p.G606E
BRAF	7	140453120	140453121	p.S605N
BRAF	7	140453133	140453134	p.K601E
BRAF	7	140453134	140453136	p.V600E
BRAF	7	140453138	140453139	p.T599I
BRAF	7	140453145	140453146	p.L597V
BRAF	7	140453147	140453148	p.G596D
BRAF	7	140453148	140453149	p.G596R
BRAF	7	140453149	140453150	p.F595L
BRAF	7	140453154	140453155	p.D594N
BRAF	7	140453158	140453159	p.I592M
BRAF	7	140453174	140453175	p.D587A
BRAF	7	140453176	140453177	p.E586E
BRAF	7	140453178	140453179	p.E586K
BRAF	7	140453182	140453183	p.L584L
BRAF	7	140453184	140453185	p.L584F
BRAF	7	140453185	140453186	p.F583F
BRAF	7	140453188	140453189	p.I582M
BRAF	7	140453192	140453193	p.N581S
BRAF	7	140476795	140476796	p.L537S
BRAF	7	140481396	140481397	p.V471F
BRAF	7	140481400	140481403	p.G469S
BRAF	7	140481411	140481412	p.G466R
BRAF	7	140481416	140481417	p.G464E
BRAF	7	140481422	140481423	p.R462I
BRAF	7	140481450	140481451	p.P453T
BRAF	7	140481477	140481478	p.R444W
BRAF	7	140500216	140500217	p.E309*
BRCA1	17	41199694	41199695	p.Q1811L
BRCA1	17	41201180	41201181	p.G1788V
BRCA1	17	41243517	41243518	p.D1344H
BRCA1	17	41244000	41244001	p.K1183R
BRCA1	17	41244184	41244186	p.N1121fs
BRCA1	17	41244467	41244468	p.S1027I
BRCA1	17	41244523	41244524	p.S1009P
BRCA1	17	41244936	41244937	p.P871L
BRCA1	17	41244747	41244748	p.Q934*
BRCA1	17	41245483	41245487	p.T688fs
BRCA1	17	41245693	41245694	p.H619N
BRCA1	17	41245984	41245985	p.A521
BRCA1	17	41246480	41246481	p.Q356R
BRCA1	17	41256151	41256152	NA
BRCA1	17	41276046	41276047	p.E23fs
BRCA1	17	41276088	41276089	p.E9Q
BRCA2	13	32905148	32905150	p.E260fs
BRCA2	13	32906729	32906730	p.N372H
BRCA2	13	32907408	32907413	p.S599fs
BRCA2	13	32911963	32911964	p.E1158Q
BRCA2	13	32912064	32912065	p.K1191N
BRCA2	13	32912554	32912555	p.D1355Y
BRCA2	13	32913537	32913538	p.S1682T
BRCA2	13	32915119	32915120	p.E2210K
BRCA2	13	32921031	32921032	p.R2336C
BRCA2	13	32929160	32929161	p.E2391K
BRCA2	13	32936801	32936802	p.E2650Q
BRCA2	13	32937325	32937326	p.E2663K
BRCA2	13	32953475	32953476	p.L2926*
BRCA2	13	32954171	32954172	p.Y3049S
BRCA2	13	32971061	32971062	p.E3177Q
BRCA2	13	32972560	32972561	p.C3304S
BRCA2	13	32972573	32972574	p.Y3308*
CCND1	11	69456187	69456188	p.E36K
CCND1	11	69456206	69456207	p.V42A
CCND1	11	69456211	69456212	p.Y44D
CCND1	11	69456217	69456218	p.K46E
CCND1	11	69456220	69456221	p.C47S
CCND1	11	69465939	69465940	p.R260C
CCND1	11	69465961	69465962	p.D267G
CCND1	11	69466021	69466022	p.P287S
CCNE1	19	30308146	30308147	p.R95W
CCNE1	19	30311662	30311663	p.F172L
CCNE1	19	30311678	30311679	p.A178T
CCNE1	19	30312972	30312973	p.L259I
CCNE1	19	30313408	30313409	p.M336I
CCNE1	19	30313456	30313457	p.A353T
CCNE1	19	30313494	30313495	p.D365
CCNE1	19	30314671	30314672	p.P407L
CCNE1	19	30314680	30314681	p.A410V
CDH1	16	68772202	68772204	p.S19fs
CDH1	16	68772217	68772218	p.Q23*
CDH1	16	68772253	68772254	p.E35*
CDH1	16	68772256	68772257	p.S36fs
CDH1	16	68835595	68835596	p.R63*
CDH1	16	68835599	68835600	p.Q64fs
CDH1	16	68835600	68835601	p.64_65QR>HW
CDH1	16	68835617	68835618	p.S70F
CDH1	16	68835648	68835650	p.V82fs*13
CDH1	16	68835779	68835781	p.P127fs
CDH1	16	68842413	68842414	p.P159fs
CDH1	16	68842416	68842418	p.P160fs
CDH1	16	68844103	68844105	p.H233fs
CDH1	16	68844138	68844139	p.E243K
CDH1	16	68844190	68844191	p.P260H
CDH1	16	68844222	68844232	p.M272fs
CDH1	16	68845624	68845625	p.D291fs
CDH1	16	68845684	68845686	p.D313fs
CDH1	16	68845761	68845762	p.E336
CDH1	16	68846042	68846043	p.P339fs
CDH1	16	68846085	68846086	p.E353*
CDH1	16	68846120	68846127	p.V365fs
CDH1	16	68846136	68846137	p.D370H
CDH1	16	68846165	68846166	p.T379
CDH1	16	68847273	68847277	p.T399fs*17
CDH1	16	68847277	68847279	p.A400fs
CDH1	16	68847303	68847304	p.W409L
CDH1	16	68849592	68849594	p.F499fs
CDH1	16	68849603	68849604	p.Q503*
CDH1	16	68849607	68849608	p.I505fs
CDH1	16	68849627	68849628	p.Q511*
CDH1	16	68849647	68849648	p.E518fs
CDH1	16	68855934	68855936	p.L582fs
CDH1	16	68855965	68855967	p.I594fs
CDH1	16	68855976	68856002	p.P597fs
CDH1	16	68856010	68856011	p.P607S
CDH1	16	68856066	68856068	p.T626fs
CDH1	16	68856112	68856113	p.Q641X
CDH1	16	68856121	68856122	p.D644N
CDH1	16	68857310	68857312	p.I650fs
CDH1	16	68857330	68857337	p.M656fs
CDH1	16	68857366	68857367	p.K668*
CDH1	16	68857396	68857398	p.T679fs
CDH1	16	68857484	68857485	p.P708fs
CDH1	16	68862106	68862107	p.R732Q
CDH1	16	68862177	68862179	p.E757fs
CDH1	16	68862178	68862180	p.E757fs
CDH1	16	68862202	68862204	p.Q765fs
CDH1	16	68863621	68863635	p.A788fs
CDH1	16	68863676	68863677	p.E806*
CDH1	16	68867232	68867234	p.S829fs
CDH1	16	68867352	68867353	p.N867S
CDK4	12	58144470	58144470	p.G201R
CDK4	12	58144764	58144765	p.K155Q
CDK4	12	58145373	58145374	p.G43E
CDK6	7	92244521	92244522	p.R305K
CDK6	7	92355059	92355060	p.H139Q
CDK6	7	92404027	92404028	p.P118S
CDKN1B	12	12870852	12870853	p.S27*
CDKN1B	12	12870899	12870901	p.R43fs
CDKN1B	12	12870934	12870936	p.S55fs
CDKN1B	12	12871005	12871007	p.V79fs
CDKN1B	12	12871092	12871093	p.Q107*
CDKN1B	12	12871145	12871147	p.E126fs
CDKN1B	12	12871174	12871175	p.T135fs
CDKN1B	12	12871794	12871795	p.E171*
CDKN2A	9	21970970	21970971	p.Y129*
CDKN2A	9	21970987	21970988	p.R124fs*22
CDKN2A	9	21970992	21970993	p.G122V
CDKN2A	9	21970999	21971000	p.E120*
CDKN2A	9	21971028	21971029	p.W110*
CDKN2A	9	21971044	21971045	p.D105fs*41
CDKN2A	9	21971107	21971109	p.D84fs*63
CDKN2A	9	21971113	21971115	p.P81fs*38
CDKN2A	9	21971128	21971130	p.T77fs*43
CDKN2A	9	21971141	21971142	p.C72*
CDKN2A	9	21971152	21971153	p.E69*
CDKN2A	9	21971168	21971184	p.V59fs*82
CDKN2A	9	21971176	21971177	p.E61*
CDKN2A	9	21971184	21971198	p.M54fs*61
CDKN2A	9	21971185	21971186	p.R58*
CDKN2A	9	21971196	21971198	p.M54fs*66
CDKN2B	9	22006224	22006225	p.R60H
CDKN2B	9	22008835	22008836	p.P40S
CDKN2B	9	22008871	22008872	p.E28Q
CDKN2B	9	22008900	22008901	p.L18V
CTCF		67644738	67644739	p.M1I
CTCF		67644796	67644797	p.E21*
CTCF		67644837	67644838	p.E34
CTCF		67644883	67644884	p.V50L
CTCF		67645308	67645309	p.W191*
CTCF		67645412	67645413	p.Y226C
CTCF		67645507	67645508	p.K258E
CTCF		67645919	67645920	p.R283C
CTCF		67645922	67645923	p.H284Y
CTCF		67645934	67645935	p.H288D
CTCF		67645944	67645945	p.E291G
CTCF		67654645	67654646	p.P378A
CTCF		67655431	67655432	p.E432*
CTCF		67655479	67655480	p.R448*
CTCF		67660469	67660470	p.R457*
CTCF		67670628	67670629	p.E625*
CTNNB1	3	41266039	41266040	p.A13T
CTNNB1	3	41266045	41266046	p.E15K
CTNNB1	3	41266061	41266062	p.A20V
CTNNB1	3	41266063	41266064	p.A21T
CTNNB1	3	41266067	41266068	p.V22A
CTNNB1	3	41266069	41266070	p.S23G
CTNNB1	3	41266092	41266093	p.Y30*
CTNNB1	3	41266093	41266094	p.L31L
CTNNB1	3	41266096	41266097	p.D32Y
CTNNB1	3	41266100	41266101	p.S33C
CTNNB1	3	41266102	41266103	p.G34R
CTNNB1	3	41266106	41266107	p.I35S
CTNNB1	3	41266108	41266109	p.H36Y
CTNNB1	3	41266112	41266113	p.S37C
CTNNB1	3	41266114	41266117	p.G38P
CTNNB1	3	41266118	41266119	p.A39G
CTNNB1	3	41266121	41266122	p.T40I
CTNNB1	3	41266125	41266126	p.T41T
CTNNB1	3	41266127	41266128	p.T42I
CTNNB1	3	41266130	41266131	p.A43V
CTNNB1	3	41266132	41266133	p.P44A
CTNNB1	3	41266136	41266137	p.S45Y
CTNNB1	3	41266140	41266141	p.L46L
CTNNB1	3	41266592	41266593	p.Q130
CTNNB1	3	41268805	41268806	p.S348
CTNNB1	3	41280698	41280699	p.E738K
DNAH14	1	225306959	225306960	p.V1377G
DNAH14	1	225380527	225380528	p.R1507*
DNAH14	1	225458552	225458553	p.L2006*
DNAH14	1	225533726	225533727	p.E2685K
EGFR	7	55211079	55211080	p.R108K
EGFR	7	55211096	55211097	p.E114K
EGFR	7	55219020	55219021	p.S198
EGFR	7	55221772	55221773	p.T273A
EGFR	7	55221795	55221796	p.N280K
EGFR	7	55221799	55221800	p.E282K
EGFR	7	55221820	55221821	p.A289T
EGFR	7	55223634	55223635	p.R334
EGFR	7	55229269	55229270	p.C526S
EGFR	7	55233036	55233037	p.P596L
EGFR	7	55233042	55233043	p.G598V
EGFR	7	55241643	55241644	p.A698T
EGFR	7	55241655	55241656	p.A702S
EGFR	7	55241685	55241686	p.F712L
EGFR	7	55241686	55241687	p.F712S
EGFR	7	55241705	55241707	p.G719C
EGFR	7	55241721	55241722	p.G724S
EGFR	7	55242417	55242418	p.L730F
EGFR	7	55242432	55242433	p.G735S
EGFR	7	55242442	55242443	p.V738G
EGFR	7	55242451	55242452	p.P741L
EGFR	7	55242454	55242455	p.V742A
EGFR	7	55242456	55242457	p.A743T
EGFR	7	55242468	55242470	p.L747P
EGFR	7	55242481	55242482	p.T751I
EGFR	7	55242489	55242490	p.K754E
EGFR	7	55242510	55242511	p.D761N
EGFR	7	55248994	55248995	p.V765M
EGFR	7	55249009	55249010	p.D770N
EGFR	7	55249021	55249022	p.V774M
EGFR	7	55249036	55249038	p.G779F
EGFR	7	55249051	55249052	p.S784P
EGFR	7	55249070	55249071	p.T790M
EGFR	7	55249076	55249077	p.L792P
EGFR	7	55249129	55249130	p.G810S
EGFR	7	55249142	55249143	p.L814P
EGFR	7	55249158	55249159	p.V819V
EGFR	7	55249163	55249164	p.I821T
EGFR	7	55259481	55259482	p.T847K
EGFR	7	55259514	55259516	p.L858R
EGFR	7	55259516	55259517	p.A859T
EGFR	7	55259523	55259524	p.L861R
EGFR	7	55259537	55259538	p.E866Q
EGFR	7	55259550	55259551	p.H870R
EGFR	7	55259552	55259553	p.A871T
EGFR	7	55266455	55266456	p.D916
EGFR	7	55268033	55268034	p.R958
ERBB2	17	37868204	37868205	p.G309A
ERBB2	17	37868204	37868206	p.G309A
ERBB2	17	37868204	37868206	p.G309E
ERBB2	17	37868207	37868209	p.S310F
ERBB2	17	37872088	37872089	p.H470Q
ERBB2	17	37879657	37879658	p.R678Q
ERBB2	17	37879657	37879659	p.R678Q
ERBB2	17	37880219	37880220	p.L755S
ERBB2	17	37880219	37880230	p.del.755-759
ERBB2	17	37880219	37880221	p.L755S
ERBB2	17	37880219	37880221	p.L755W
ERBB2	17	37880255	37880257	p.I767M
ERBB2	17	37880256	37880257	p.I767M
ERBB2	17	37880260	37880261	p.D769Y
ERBB2	17	37880260	37880261	p.D769H
ERBB2	17	37880261	37880263	p.D769H
ERBB2	17	37880999	37881000	p.V777L
ERBB2	17	37881000	37881002	p.V777L
ERBB2	17	37881000	37881002	p.V777L
ERBB2	17	37881311	37881313	p.Y835F
ERBB2	17	37881331	37881332	p.V842I
ERBB2	17	37881332	37881334	p.V842I
ERBB2	17	37881439	37881440	p.H878Y
ERBB2	17	37881616	37881618	p.R896C
ERBB2	17	37883560	37883561	p.D1058A
ERBB2	17	37884130	37884132	p.G1201V
ERBB3	12	56478825	56478826	p.F94L
ERBB3	12	56478854	56478855	p.V104M
ERBB3	12	56479000	56479001	p.Q153*
ERBB3	12	56482340	56482341	p.D297Y
ERBB3	12	56482342	56482343	p.D297E
ERBB3	12	56482388	56482389	p.D313H
ERBB3	12	56482437	56482438	p.K329T
ERBB3	12	56482537	56482538	p.E332K
ERBB3	12	56482606	56482607	p.T355I
ERBB3	12	56486552	56486553	p.A378P
ERBB3	12	56487277	56487278	p.R475W
ERBB3	12	56487648	56487649	p.V528F
ERBB3	12	56489534	56489535	p.R667L
ERBB3	12	56490900	56490901	p.L783V
ERBB3	12	56490927	56490928	p.L792V
ERBB3	12	56495314	56495315	p.T1169P
ERBB3	12	56495591	56495592	p.E1261A
ERBB4	2	212248392	212248393	p.P1292S
ERBB4	2	212248653	212248654	p.E1205K
ERBB4	2	212248739	212248740	NA
ERBB4	2	212285276	212285277	p.L1008
ERBB4	2	212288939	212288940	p.G936R
ERBB4	2	212288941	212288942	p.K935I
ERBB4	2	212289006	212289007	p.L913
ERBB4	2	212488740	212488741	p.T703K
ERBB4	2	212530065	212530066	p.H618P
ERBB4	2	212530134	212530135	p.D595V
ERBB4	2	212543899	212543900	p.G500E
ERBB4	2	212576856	212576857	p.V348L
ERBB4	2	212576876	212576877	p.S341L
ERBB4	2	212578348	212578349	p.S303Y
ERBB4	2	212587146	212587147	p.Y285C
ERBB4	2	212589810	212589811	p.T244R
ERBB4	2	212652763	212652764	p.N181S
ERBB4	2	212652790	212652791	p.P172R
ERBB4	2	212812156	212812157	p.T140I
ERBB4	2	212989492	212989493	p.D73V
ESR1	6	152129127	152129131	p.P29fs
ESR1	6	152201809	152201810	p.P222S
ESR1	6	152265454	152265455	p.K303R
ESR1	6	152332832	152332834	p.E380Q
ESR1	6	152332868	152332870	p.V392I
ESR1	6	152332880	152332882	p.M396V
ESR1	6	152415536	152415537	p.S463P
ESR1	6	152415536	152415537	p.S463P
ESR1	6	152419913	152419914	p.V534E
ESR1	6	152419913	152419914	p.V534E
ESR1	6	152419918	152419919	p.L536P
ESR1	6	152419919	152419920	p.L536Q
ESR1	6	152419919	152419920	p.L536R
ESR1	6	152419919	152419921	p.L536Q
ESR1	6	152419919	152419920	p.L536R
ESR1	6	152419921	152419922	p.Y537N
ESR1	6	152419921	152419922	p.Y537N
ESR1	6	152419922	152419923	p.Y537S
ESR1	6	152419922	152419923	p.Y537S
ESR1	6	152419925	152419926	p.D538G
ESR1	6	152419925	152419926	p.D538G
EZH2	7	148508727	148508728	p.Y646N
EZH2	7	148508732	148508733	p.S644*
EZH2	7	148508743	148508744	p.N640K
EZH2	7	148508756	148508757	p.P636L
EZH2	7	148508726	148508727	p.Y602S
EZH2	7	148525901	148525902	p.D185
FGF19	11	69514117	69514118	p.F188L
FGF19	11	69514154	69514155	p.P176H
FGF19	11	69514229	69514230	p.R151L
FGFR1	8	38271188	38271189	p.R840Q
FGFR1	8	38271456	38271457	p.I757
FGFR1	8	38272306	38272307	p.K656M
FGFR1	8	38273401	38273402	p.L614V
FGFR1	8	38275445	38275446	p.I498
FGFR1	8	38282146	38282147	p.N272
FGFR1	8	38282208	38282209	p.P252T
FGFR1	8	38285937	38285938	p.S125L
FGFR1	8	38314913	38314914	p.T17
FGFR2	10	123239385	123239386	p.G818
FGFR2	10	123247596	123247597	p.V633I
FGFR2	10	123256148	123256149	p.S588C
FGFR2	10	123258033	123258034	p.N550K
FGFR2	10	123258048	123258049	p.H545Q
FGFR2	10	123274680	123274681	NA
FGFR2	10	123274773	123274774	p.C382R
FGFR2	10	123274793	123274794	p.Y375C
FGFR2	10	123274802	123274803	p.S372C
FGFR2	10	123279502	123279503	p.K310R
FGFR2	10	123279673	123279674	p.P253R
FGFR2	10	123279676	123279677	p.S252W
FGFR2	10	123353237	123353238	p.T32A
FGFR3	4	1803563	1803564	p.R248C
FGFR3	4	1803567	1803568	p.S249C
FGFR3	4	1803574	1803575	p.H251H
FGFR3	4	1806087	1806088	p.A369A
FGFR3	4	1806088	1806089	p.G370C
FGFR3	4	1806091	1806092	p.S371C
FGFR3	4	1806098	1806099	p.Y373C
FGFR3	4	1806118	1806119	p.G380R
FGFR3	4	1806130	1806131	p.F384L
FGFR3	4	1806152	1806153	p.A391E
FGFR3	4	1807861	1807862	p.D641N
FGFR3	4	1807888	1807889	p.K650E
FGFR3	4	1808374	1808375	p.P689S
FGFR3	4	1808330	1808331	p.G697C
FGFR3	4	1808948	1808949	p.L794fs*23
FGFR4	5	176517963	176517964	p.R154H
FGFR4	5	176518689	176518690	p.R203C
FGFR4	5	176519391	176519392	p.D266
FGFR4	5	176519684	176519685	p.Y319*
FGFR4	5	176519703	176519704	p.E326K
FGFR4	5	176520706	176520707	p.A484T
FGFR4	5	176522416	176522417	p.N495K
FGFR4	5	176522551	176522552	p.V510M
FGFR4	5	176523632	176523633	p.E641E
FGFR4	5	176524358	176524359	p.E741fs
FOXA1	14	38060746	38060748	p.L415fs
FOXA1	14	38060754	38060762	p.E410fs
FOXA1	14	38060904	38060905	p.S362Y
FOXA1	14	38061192	38061193	p.F266I
FOXA1	14	38061221	38061222	p.N256I
FOXA1	14	38061227	38061232	p.M253fs
FOXA1	14	38061239	38061240	p.S250F
FOXA1	14	38061249	38061250	p.H247Y
FOXA1	14	38061311	38061312	p.D226G
FOXA1	14	38061312	38061313	p.D226N
FOXA1	14	38061346	38061347	p.W214C
FOXA1	14	38061409	38061410	p.S194fs
FOXA1	14	38061460	38061461	p.I176M
FOXA1	14	38061462	38061463	p.I176V
FOXA1	14	38061530	38061531	p.A153V
FOXA1	14	38061742	38061743	p.A83T
FOXA1	14	38061883	38061890	p.M34fs
GATA3	10	8097817	8097818	p.S67W
GATA3	10	8100381	8100382	p.K119M
GATA3	10	8100408	8100409	p.G128W
GATA3	10	8100439	8100440	p.S138
GATA3	10	8100444	8100445	p.L141del
GATA3	10	8106004	8106005	p.R276Q
GATA3	10	8106057	8106058	p.M294R
GATA3	10	8106057	8106058	p.M294K
GATA3	10	8111470	8111472	p.C320fs
GATA3	10	8111493	8111495	p.R331fs
GATA3	10	8111495	8111497	p.R331fs
GATA3	10	8111497	8111499	p.R330fs
GATA3	10	8111500	8111502	p.R330fs
GATA3	10	8111502	8111503	p.R331K
GATA3	10	8111502	8111504	p.R331fs
GATA3	10	8111505	8111507	p.N332fs
GATA3	10	8111506	8111508	p.A332fs
GATA3	10	8111512	8111514	p.D335fs
GATA3	10	8111542	8111544	p.Y345fs
GATA3	10	8111542	8111544	p.Y344fs
GATA3	10	8111557	8111559	p.I350fs
GATA3	10	8115700	8115704	p.N351fs
GATA3	10	8115704	8115706	p.N352fs
GATA3	10	8115716	8115718	p.K358fs
GATA3	10	8115718	8115720	p.M357fs
GATA3	10	8115724	8115728	p.E360fs
GATA3	10	8115732	8115734	p.T365fs
GATA3	10	8115736	8115749	p.Q363fs
GATA3	10	8115745	8115746	p.R365S
GATA3	10	8115809	8115829	p.K388fs
GATA3	10	8115831	8115833	p.A395fs
GATA3	10	8115842	8115844	p.R399fs
GATA3	10	8115850	8115852	p.M400fs
GATA3	10	8115850	8115852	p.S402fs
GATA3	10	8115851	8115853	p.M401fs
GATA3	10	8115852	8115854	p.S402fs
GATA3	10	8115871	8115872	p.S408fs
GATA3	10	8115872	8115873	p.S407fs
GATA3	10	8115872	8115873	p.S407fs
GATA3	10	8115872	8115874	p.P409fs
GATA3	10	8115873	8115874	p.S407fs
GATA3	10	8115873	8115875	p.P409fs
GATA3	10	8115873	8115874	p.S408fs
GATA3	10	8115873	8115875	p.P409fs
GATA3	10	8115875	8115877	p.P409fs
GATA3	10	8115876	8115877	p.P409H
GATA3	10	8115877	8115879	p.S410fs
GATA3	10	8115906	8115914	p.P420fs
GATA3	10	8115918	8115919	NA
GATA3	10	8115921	8115923	p.P426fs
GATA3	10	8115925	8115927	p.S426fs
GATA3	10	8115927	8115929	p.S427fs
GATA3	10	8115928	8115929	p.P425fs
GATA3	10	8115929	8115931	p.S428fs
GATA3	10	8115940	8115942	p.G431fs
GATA3	10	8115941	8115943	p.F431fs
GATA3	10	8115947	8115960	p.H434fs
GATA3	10	8115951	8115953	p.H435fs
GATA3	10	8115951	8115953	p.H435fs
GATA3	10	8115954	8115956	p.S437fs
GATA3	10	8115964	8115966	p.M438fs
GATA3	10	8115972	8115976	p.A442fs
GATA3	10	8115977	8115979	p.M443fs
GATA3	10	8115981	8115983	p.*445fs
GATA3	10	8115984	8115986	p.*445fs
GRB7	17	37898673	37898674	p.K40N
GRB7	17	37898826	37898827	p.R55Q
GRB7	17	37899228	37899229	p.E129Q
GRB7	17	37899235	37899236	p.L131Q
GRB7	17	37899252	37899253	p.A137T
GRB7	17	37901738	37901739	p.E385K
GRB7	17	37902199	37902200	p.R435H
GRB7	17	37902435	37902436	p.K478Q
HIST2H2BE	1	149857850	149857851	p.E114K
HIST2H2BE	1	149857978	149857979	p.F71L
HIST2H2BE	1	149858080	149858081	p.S37R
HIST2H2BE	1	149858178	149858179	p.A5T
HLA-A	6	29910587	29910588	p.E43*
HLA-A	6	29911228	29911229	p.E176A
HLA-A	6	29911295	29911296	p.G199R
HRAS	11	533872	533873	p.Q61H
HRAS	11	534226	534227	p.Y32
HRAS	11	534285	534286	p.G13R
HRAS	11	534287	534288	p.G12D
IDH1	2	209113112	209113113	p.R132C
IDH1	2	209113112	209113113	p.R132G
IDH1	2	209113138	209113139	p.G123E
IDH1	2	209113139	209113140	p.G123R
IDH1	2	209113150	209113151	p.R119Q
IDH1	2	209113159	209113160	p.N116S
IDH1	2	209113191	209113192	p.G105G
IGF1R	15	99440126	99440127	p.R365Q
IGF1R	15	99440130	99440131	p.G367W
IGF1R	15	99456362	99456363	p.K560N
IGF1R	15	99456510	99456511	p.V610I
IGF1R	15	99478056	99478057	p.Y987
IGF1R	15	99486280	99486281	p.W1196*
IGF1R	15	99500377	99500378	NA
IKBKB	8	42163895	42163896	p.K171T
IKBKB	8	42171888	42171889	p.D248Y
IKBKB	8	42174375	42174376	p.A360S
IKBKB	8	42174287	42174288	p.E331*
IKBKB	8	42177137	42177138	p.E518K
IKBKB	8	42179427	42179428	p.R568M
IKBKB	8	42179664	42179665	p.Q611*
IKBKE	1	206648209	206648210	p.G77
IKBKE	1	206649566	206649567	p.R134
IKBKE	1	206649693	206649694	p.E177Q
IKBKE	1	206650161	206650162	p.R228W
IKBKE	1	206653815	206653816	p.R456W
IKBKE	1	206658370	206658371	p.L489
IKBKE	1	206658601	206658602	p.R525P
IKBKE	1	206658613	206658614	p.K529N
IKBKE	1	206658613	206658614	p.K529
IKBKE	1	206669458	206669459	p.P711S
INPP4B	4	143067051	143067052	p.G554D
INPP4B	4	143067097	143067098	p.V539A
INPP4B	4	143081713	143081714	p.T454R
INPP4B	4	143094873	143094874	p.I424L
INPP4B	4	143114275	143114276	p.R382Q
INPP4B	4	143129610	143129611	p.Q347E
INPP4B	4	143159105	143159106	p.R250*
INPP4B	4	143181674	143181675	p.G220R
INPP4B	4	143226675	143226676	p.G146
INSR	19	7117197	7117198	p.A1340V
INSR	19	7122973	7122974	p.K1095
INSR	19	7141752	7141753	p.E873Q
INSR	19	7163182	7163183	p.S630L
INSR	19	7166386	7166387	p.G547R
INSR	19	7267484	7267485	p.N175S
INSR	19	7267520	7267521	p.I163V
JAK2	9	5022118	5022119	p.Y44*
JAK2	9	5022150	5022151	p.L55P
JAK2	9	5029899	5029900	p.R115I
JAK2	9	5044447	5044448	p.Y132*
JAK2	9	5073769	5073770	p.V617F
JAK2	9	5077522	5077523	p.N646fs
JAK2	9	5090863	5090864	p.D1004fs
JAK3	19	17937696	17937697	p.C1077F
JAK3	19	17945507	17945508	p.R741Q
JAK3	19	17945695	17945696	p.V722I
JAK3	19	17945964	17945965	p.E658
JAK3	19	17948005	17948006	p.A573V
JAK3	19	17948828	17948829	p.G538D
JAK3	19	17949173	17949174	p.Q489H
JAK3	19	17952197	17952198	p.T381I
JAK3	19	17954214	17954215	p.P132T
JAK3	19	17954273	17954280	p.F110fs
JUN	1	59248408	59248409	p.E112K
KDR	4	55946113	55946116	p.P1355del
KDR	4	55946256	55946257	p.G1308*
KDR	4	55953836	55953837	p.S1200Y
KDR	4	55955082	55955083	p.S1154
KDR	4	55955126	55955127	p.L1140M
KDR	4	55960988	55960989	p.S984T
KDR	4	55961022	55961023	p.A973S
KDR	4	55962506	55962507	p.G873R
KDR	4	55973911	55973912	p.N468
KDR	4	55979641	55979642	p.H269Y
KDR	4	55980406	55980407	p.L228
KIT	4	55561715	55561716	p.P36T
KIT	4	55561726	55561727	p.I39M
KIT	4	55565831	55565832	p.A219V
KIT	4	55569971	55569972	p.A280V
KIT	4	55589812	55589813	p.G432E
KIT	4	55593602	55593603	p.W557R
KIT	4	55593609	55593610	p.V559D
KIT	4	55593660	55593661	p.L576P
KIT	4	55594220	55594221	p.K642E
KIT	4	55599319	55599320	p.D816Y
KIT	4	55599332	55599333	p.D820V
KMT2C (MLL3)	7	151841850	151841852	p.K4763fs
KMT2C (MLL3)	7	151843774	151843776	p.K4647fs
KMT2C (MLL3)	7	151845281	151845283	p.P4577fs
KMT2C (MLL3)	7	151845515	151845516	p.K4499R
KMT2C (MLL3)	7	151845738	151845739	p.D4425Y
KMT2C (MLL3)	7	151845843	151845844	p.K4391fs
KMT2C (MLL3)	7	151845879	151845880	p.E4378K
KMT2C (MLL3)	7	151849845	151849846	p.L4157fs
KMT2C (MLL3)	7	151851130	151851132	p.S4081fs
KMT2C (MLL3)	7	151855980	151855982	p.Y3879fs
KMT2C (MLL3)	7	151859300	151859311	p.K3784fs
KMT2C (MLL3)	7	151859395	151859396	p.A3756fs
KMT2C (MLL3)	7	151859456	151859457	p.K3735fs
KMT2C (MLL3)	7	151859570	151859571	p.T3698A
KMT2C (MLL3)	7	151859911	151859912	p.G3584R
KMT2C (MLL3)	7	151860090	151860091	p.V3524A
KMT2C (MLL3)	7	151860480	151860481	p.S3394N
KMT2C (MLL3)	7	151860727	151860728	p.Q3312*
KMT2C (MLL3)	7	151871272	151871273	p.G3106D
KMT2C (MLL3)	7	151874089	151874090	p.T2817fs
KMT2C (MLL3)	7	151875095	151875096	p.R2481S
KMT2C (MLL3)	7	151878505	151878506	p.Q2147*
KMT2C (MLL3)	7	151878892	151878894	p.Q2017fs
KMT2C (MLL3)	7	151878970	151878971	p.E1992Q
KMT2C (MLL3)	7	151879567	151879568	p.L1793F
KMT2C (MLL3)	7	151880093	151880094	p.E1744*
KMT2C (MLL3)	7	151882644	151882646	p.V1693fs
KMT2C (MLL3)	7	151882658	151882659	p.E1689fs
KMT2C (MLL3)	7	151891153	151891154	p.Q1534*
KMT2C (MLL3)	7	151891575	151891576	p.E1486*
KMT2C (MLL3)	7	151891625	151891626	p.S1469F
KMT2C (MLL3)	7	151896495	151896496	p.I1381V
KMT2C (MLL3)	7	151904385	151904386	p.P1280
KMT2C (MLL3)	7	151917644	151917646	p.S1225fs
KMT2C (MLL3)	7	151917667	151917668	p.Q1218*
KMT2C (MLL3)	7	151917807	151917808	p.T1171S
KMT2C (MLL3)	7	151919732	151919733	p.E1120*
KMT2C (MLL3)	7	151921672	151921673	p.W1002*
KMT2C (MLL3)	7	151927041	151927042	p.G981D
KMT2C (MLL3)	7	151927053	151927054	p.C977Y
KMT2C (MLL3)	7	151932948	151932949	p.G908C
KMT2C (MLL3)	7	151932950	151932952	p.R907fs
KMT2C (MLL3)	7	151932960	151932961	p.R904*
KMT2C (MLL3)	7	151945139	151945140	p.S793
KMT2C (MLL3)	7	151945353	151945354	p.G722E
KMT2C (MLL3)	7	151945365	151945366	p.E718A
KMT2C (MLL3)	7	151945450	151945451	p.E690*
KMT2C (MLL3)	7	151945473	151945474	p.S682*
KMT2C (MLL3)	7	151945600	151945601	p.E640*
KMT2C (MLL3)	7	151945621	151945622	p.E633fs
KMT2C (MLL3)	7	151945658	151945660	p.N621fs
KMT2C (MLL3)	7	151948033	151948034	p.E547K
KMT2C (MLL3)	7	151960109	151960110	p.W430C
KMT2C (MLL3)	7	151960148	151960149	p.C417*
KMT2C (MLL3)	7	151960159	151960160	p.H414Y
KMT2C (MLL3)	7	151962207	151962208	p.H367D
KMT2C (MLL3)	7	151962207	151962208	p.H367Y
KMT2C (MLL3)	7	151962211	151962212	p.H365Q
KMT2C (MLL3)	7	151962224	151962225	p.T361I
KMT2C (MLL3)	7	151970834	151970835	p.I323V
KMT2C (MLL3)	7	151970849	151970850	p.Q318*
KMT2C (MLL3)	7	151970854	151970855	p.T316N
KMT2C (MLL3)	7	151970858	151970859	p.G315S
KMT2C (MLL3)	7	151970876	151970877	p.P309S
KMT2C (MLL3)	7	151970889	151970890	p.Q304fs
KMT2C (MLL3)	7	151970950	151970951	p.R284Q
KMT2C (MLL3)	7	151970951	151970952	p.R284*
KMT2C (MLL3)	7	152012229	152012230	p.Q195*
KMT2C (MLL3)	7	152012380	152012381	p.L145fs
KMT2C (MLL3)	7	152012411	152012412	p.C134Y
KMT2C (MLL3)	7	152027749	152027750	p.Q109*
KMT2C (MLL3)	7	152027785	152027786	p.E97Q
KRAS	12	25380274	25380275	p.Q61H
KRAS	12	25398279	25398281	p.G13D
KRAS	12	25398283	25398284	p.G12V
KRAS	12	25398283	25398284	p.G12D
KRAS	12	25398284	25398285	p.G12C
MAP2K4	17	11958294	11958295	p.Q69*
MAP2K4	17	11984782	11984783	p.R110*
MAP2K4	17	11984788	11984790	p.Y113fs
MAP2K4	17	11984839	11984856	p.A129fs
MAP2K4	17	11998897	11998898	p.R134W
MAP2K4	17	11998970	11998972	p.Y160fs
MAP2K4	17	11998992	11998993	p.Y165*
MAP2K4	17	12011107	12011109	p.D173fs
MAP2K4	17	12011143	12011144	p.S184L
MAP2K4	17	12011149	12011150	p.D186G
MAP2K4	17	12011211	12011212	p.K207*
MAP2K4	17	12016615	12016616	p.S251I
MAP2K4	17	12016633	12016634	p.S257F
MAP2K4	17	12016646	12016648	p.D263fs
MAP2K4	17	12016656	12016663	p.C266fs
MAP2K4	17	12028613	12028614	p.E273K
MAP2K4	17	12028659	12028660	p.S288F
MAP2K4	17	12028664	12028665	p.V290F
MAP2K4	17	12032458	12032459	p.E299*
MAP2K4	17	12032480	12032481	p.P306R
MAP2K4	17	12032509	12032510	p.Q316*
MAP2K4	17	12032515	12032517	p.Q319fs
MAP2K4	17	12032541	12032542	p.P326L
MAP2K4	17	12032569	12032571	p.S339fs
MAP2K4	17	12044529	12044530	p.L385V
MAP2K4	17	12044530	12044531	p.L385P
MAP3K1	5	56152453	56152455	p.G171fs
MAP3K1	5	56152544	56152545	p.W201R
MAP3K1	5	56152572	56152574	p.V211fs
MAP3K1	5	56155571	56155572	p.G222fs
MAP3K1	5	56155604	56155605	p.P233fs
MAP3K1	5	56155724	56155726	p.R273fs
MAP3K1	5	56160564	56160565	p.Q280P
MAP3K1	5	56160577	56160579	p.P286fs
MAP3K1	5	56160678	56160680	p.L319fs
MAP3K1	5	56160696	56160700	p.N325fs
MAP3K1	5	56160760	56160761	p.Q345
MAP3K1	5	56161190	56161191	p.F354fs
MAP3K1	5	56161238	56161240	p.S371fs
MAP3K1	5	56161268	56161269	p.L380fs
MAP3K1	5	56161677	56161678	p.Y392C
MAP3K1	5	56161689	56161691	p.S397fs
MAP3K1	5	56161794	56161795	p.S431*
MAP3K1	5	56167800	56167802	p.T457fs
MAP3K1	5	56167803	56167805	p.T457fs
MAP3K1	5	56168482	56168483	p.R480fs
MAP3K1	5	56168533	56168534	p.S497fs
MAP3K1	5	56168718	56168719	p.Q525*
MAP3K1	5	56168739	56168740	p.R532*
MAP3K1	5	56170879	56170880	p.G570fs
MAP3K1	5	56170930	56170932	p.S588fs
MAP3K1	5	56170972	56170973	p.E601*
MAP3K1	5	56171057	56171059	p.D630fs
MAP3K1	5	56171087	56171088	p.L639P
MAP3K1	5	56171108	56171115	p.V647fs
MAP3K1	5	56174850	56174852	p.E671fs
MAP3K1	5	56174908	56174909	p.K690*
MAP3K1	5	56176547	56176548	p.Q700*
MAP3K1	5	56177009	56177011	p.L763fs
MAP3K1	5	56177010	56177014	p.R763fs
MAP3K1	5	56177019	56177020	p.L764fs
MAP3K1	5	56177057	56177059	p.T778fs
MAP3K1	5	56177097	56177117	p.R790fs
MAP3K1	5	56177098	56177099	p.R790M
MAP3K1	5	56177409	56177411	p.S796fs
MAP3K1	5	56177499	56177500	p.R825*
MAP3K1	5	56177536	56177538	p.L838fs
MAP3K1	5	56177597	56177598	p.A858fs
MAP3K1	5	56177873	56177875	p.E950fs
MAP3K1	5	56177874	56177875	p.E950Q
MAP3K1	5	56177953	56177954	p.S976F
MAP3K1	5	56177977	56177978	p.S984*
MAP3K1	5	56178023	56178027	p.D1000fs
MAP3K1	5	56178084	56178085	p.Q1020*
MAP3K1	5	56178134	56178136	p.D1037fs
MAP3K1	5	56178142	56178144	p.D1040fs
MAP3K1	5	56178145	56178146	p.D1040fs
MAP3K1	5	56178149	56178153	p.K1041fs
MAP3K1	5	56178168	56178169	p.Q1048*
MAP3K1	5	56178252	56178253	p.S1077fs
MAP3K1	5	56178256	56178257	p.S1077*
MAP3K1	5	56178398	56178400	p.N1124fs
MAP3K1	5	56178399	56178400	p.N1125D
MAP3K1	5	56178410	56178411	p.L1128
MAP3K1	5	56178458	56178460	p.T1144fs
MAP3K1	5	56178465	56178467	p.T1148fs
MAP3K1	5	56178570	56178571	p.E1182*
MAP3K1	5	56178576	56178577	p.E1184*
MAP3K1	5	56178671	56178673	p.I1215fs
MAP3K1	5	56179395	56179396	p.Y1237N
MAP3K1	5	56179423	56179425	p.Q1247fs
MAP3K1	5	56180502	56180504	p.R1278fs
MAP3K1	5	56180535	56180537	p.A1290fs
MAP3K1	5	56181764	56181765	p.S1330W
MAP3K1	5	56183210	56183211	p.N1374S
MAP3K1	5	56183239	56183241	p.R1385fs
MAP3K1	5	56183295	56183297	p.E1403fs
MAP3K1	5	56183310	56183311	p.Q1408fs
MAP3K1	5	56183346	56183347	p.E1419
MAP3K1	5	56184069	56184088	p.R1428fs
MAP3K1	5	56184092	56184093	p.W1433S
MAP3K1	5	56184096	56184097	p.S1434R
MAP3K1	5	56184104	56184105	p.C1437S
MAP3K1	5	56184104	56184105	p.C1437F
MAP3K1	5	56189386	56189387	p.P1474fs
MAP3K1	5	56189422	56189436	p.L1486fs
MAP3K1	5	56189439	56189440	p.L1491H
MAP3K1	5	56189441	56189442	p.Q1492fs
MAP3K4	6	161470088	161470089	p.E262K
MAP3K4	6	161470387	161470388	p.E362*
MAP3K4	6	161470643	161470644	p.T447I
MAP3K4	6	161470712	161470713	p.V471fs
MAP3K4	6	61494549	61494550	p.Y668H
MAP3K4	6	161502010	161502011	p.F732
MAP3K4	6	161507646	161507647	p.S835*
MAP3K4	6	161507646	161507647	p.S835*
MAP3K4	6	161510421	161510422	p.Q964
MAP3K4	6	161510430	161510431	p.E967G
MAP3K4	6	161528979	161528980	p.G1366E
MAP3K4	6	161530789	161530790	p.E1413E
MDM2	12	69202260	69202261	p.V2L
MDM2	12	69233128	69233129	p.R332C
MDM2	12	69233476	69233477	NA
MDM2	12	69233528	69233529	p.M465L
MDM4	1	204495551	204495553	p.T48fs
MDM4	1	204506567	204506568	p.Q118L
MDM4	1	204506607	204506608	p.S132C
MDM4	1	204518437	204518438	p.S367L
MDM4	1	204507345	204507346	p.E141K
MDM4	1	204513769	204513770	p.T260
MET	7	116339237	116339238	p.E34K
MET	7	116339811	116339812	p.G225D
MET	7	116340221	116340223	p.M362fs
MET	7	116371754	116371755	p.R412G
MET	7	116371760	116371761	p.D414N
MET	7	116371802	116371803	p.D428N
MET	7	116399514	116399515	p.V797M
MET	7	116411602	116411603	p.D928H
MET	7	116411989	116411990	p.T1010I
MET	7	116417480	116417481	p.N1118Y
MET	7	116417498	116417499	p.H1124D
MET	7	116417518	116417519	p.L1130L
MET	7	116423412	116423413	p.Y1248H
MET	7	116423427	116423428	p.Y1253D
MET	7	116423473	116423474	p.M1268T
MTOR	1	11169376	11169377	p.I2500F
MTOR	1	11174395	11174396	p.L2427R
MTOR	1	11174871	11174872	p.E2388Q
MTOR	1	11184573	11184574	p.S2215F
MTOR	1	11187115	11187116	p.W2101L
MTOR	1	11187854	11187855	p.E2014
MTOR	1	11188176	11188177	p.I1973F
MTOR	1	11190804	11190805	p.E1799K
MTOR	1	11193224	11193225	p.L1759R
MTOR	1	11204741	11204742	p.R1612P
MTOR	1	11217312	11217313	p.E1455
MTOR	1	11270880	11270881	p.R1215T
MTOR	1	11294316	11294317	p.L738F
MTOR	1	11300582	11300583	p.L521
MTOR	1	11307745	11307746	p.L387
MTOR	1	11308034	11308035	p.F319L
MTOR	1	11308149	11308150	p.R281H
MTOR	1	11313968	11313969	p.N256S
MTOR	1	11317096	11317097	p.L133V
MTOR	1	11317204	11317205	p.E97*
MTOR	1	11319441	11319442	p.A9T
MYC	8	128750625	128750626	p.E39D
MYC	8	128750683	128750684	p.P59T
MYC	8	128750921	128750922	p.F138S
MYC	8	128750945	128750946	p.S146L
MYC	8	128751254	128751255	p.S249T
MYC	8	128752881	128752882	p.L333V
MYC	8	128753129	128753131	p.E431K
NCOA3	20	46252811	46252812	p.Q81K
NCOA3	20	46255913	46255914	p.S176P
NCOA3	20	46264186	46264187	p.P412A
NCOA3	20	46264754	46264755	p.S542L
NCOA3	20	46264772	46264773	p.L548W
NCOA3	20	46268761	46268762	p.S1016C
NCOA3	20	46271053	46271054	p.L1060F
NCOA3	20	46281212	46281213	p.S1337L
NCOR1	17	15935742	15935743	p.P2397L
NCOR1	17	15938203	15938204	p.S2337F
NCOR1	17	15942921	15942922	p.N2260K
NCOR1	17	15943782	15943783	p.I2235M
NCOR1	17	15943799	15943800	p.Q2230*
NCOR1	17	15965035	15965036	p.R1854*
NCOR1	17	15965074	15965075	p.E1841Q
NCOR1	17	15965431	15965432	p.Q1792*
NCOR1	17	15973570	15973593	p.P1467fs
NCOR1	17	15973686	15973687	p.Y1435*
NCOR1	17	15975530	15975531	p.R1275*
NCOR1	17	15978873	15978874	p.K1215R
NCOR1	17	15978995	15978996	p.Q1174H
NCOR1	17	15983301	15983302	p.P1159
NCOR1	17	15984025	15984027	p.Y1064fs
NCOR1	17	15989635	15989636	p.S1046*
NCOR1	17	15989750	15989751	p.Q1008*
NCOR1	17	15995292	15995293	p.M967I
NCOR1	17	15995307	15995326	p.G956fs
NCOR1	17	16012111	16012112	p.E724*
NCOR1	17	16012202	16012203	p.E693D
NCOR1	17	16012216	16012217	p.K689*
NCOR1	17	16024443	16024444	p.E592*
NCOR1	17	16029430	16029435	p.K532fs
NCOR1	17	16029438	16029439	p.E531Q
NCOR1	17	16029455	16029457	p.T525fs
NCOR1	17	16049834	16049835	p.Q313*
NCOR1	17	16062145	16062146	p.E220
NCOR1	17	16068341	16068352	p.V188fs
NCOR1	17	16068396	16068397	p.S172fs
NCOR1	17	16089913	16089914	p.R66Q
NCOR2	12	124816873	124816874	p.P2306A
NCOR2	12	124824738	124824740	p.S1840fs
NCOR2	12	124824900	124824901	p.E1816D
NCOR2	12	124882707	124882709	p.S612fs
NCOR2	12	124904521	124904522	p.R488Q
NCOR2	12	124979692	124979693	p.T35
NF1	17	29533315	29533316	p.R440*
NF1	17	29562778	29562779	p.F1287L
NF1	17	29588759	29588760	p.D1537H
NF1	17	29654568	29654569	p.G1774E
NF1	17	29654571	29654572	NA
NF1	17	29677227	29677228	p.R2450*
NOTCH1	9	139390730	139390731	p.Q2487L
NOTCH1	9	139390790	139390791	p.S2468*
NOTCH1	9	139390815	139390816	p.Q2460*
NOTCH1	9	139390868	139390870	p.A2441fs
NOTCH1	9	139390869	139390870	p.A2441T
NOTCH1	9	139393423	139393424	p.A2036V
NOTCH1	9	139397767	139397768	p.L1679P
NOTCH1	9	139399343	139399344	p.L1601Q
NOTCH1	9	139399388	139399389	p.L1586R
NOTCH1	9	139399408	139399411	p.V1579del
NRAS	1	115251202	115251203	p.D175N
NRAS	1	115256527	115256529	p.Q61R
NRAS	1	115258744	115258745	p.G13R
NRAS	1	115258746	115258747	p.G12D
PAK1	11	77036379	77036380	p.M531I
PAK1	11	77054912	77054913	p.L317P
PAK1	11	77103381	77103382	p.D62N
PDGFRA	4	55133782	55133783	p.V332
PDGFRA	4	55141035	55141036	p.V561D
PDGFRA	4	55141064	55141065	p.E571K
PDGFRA	4	55144147	55144148	p.N659K
PDGFRA	4	55144546	55144547	p.T674I
PDGFRA	4	55152032	55152033	p.R822H
PDGFRA	4	55152091	55152094	p.D842Y
PDGFRA	4	55156540	55156541	p.R981P
PIK3CA	3	178916822	178916823	p.F70
PIK3CA	3	178916853	178916854	p.E81K
PIK3CA	3	178916875	178916876	p.R88Q
PIK3CA	3	178916923	178916924	p.P104L
PIK3CA	3	178916935	178916936	p.R108H
PIK3CA	3	178916943	178916944	p.K111E
PIK3CA	3	178916944	178916945	p.111_112KI>N
PIK3CA	3	178916945	178916946	p.K111N
PIK3CA	3	178917477	178917478	p.G118D
PIK3CA	3	178921488	178921489	p.T324I
PIK3CA	3	178921547	178921548	p.V344M
PIK3CA	3	178921551	178921552	p.N345T
PIK3CA	3	178921552	178921553	p.N345K
PIK3CA	3	178921566	178921567	p.D350G
PIK3CA	3	178922324	178922325	p.E365V
PIK3CA	3	178922327	178922328	p.P366R
PIK3CA	3	178927429	178927430	p.R398H
PIK3CA	3	178927457	178927458	p.C407W
PIK3CA	3	178927979	178927980	p.C420R
PIK3CA	3	178928078	178928079	p.E453K
PIK3CA	3	178928085	178928087	p.L456fs
PIK3CA	3	178936073	178936074	p.P539R
PIK3CA	3	178936081	178936082	p.E542K
PIK3CA	3	178936082	178936083	p.E542G
PIK3CA	3	178936090	178936091	p.E545K
PIK3CA	3	178936090	178936091	p.E545Q
PIK3CA	3	178936091	178936092	p.E545A
PIK3CA	3	178936093	178936094	p.Q546K
PIK3CA	3	178936094	178936095	p.Q546P
PIK3CA	3	178936094	178936095	p.Q546R
PIK3CA	3	178937444	178937445	p.V611
PIK3CA	3	178937451	178937452	p.F614I
PIK3CA	3	178937497	178937498	p.S629C
PIK3CA	3	178938774	178938775	p.S673T
PIK3CA	3	178938859	178938860	p.H701P
PIK3CA	3	178938933	178938934	p.E726K
PIK3CA	3	178941945	178941946	p.L755
PIK3CA	3	178941972	178941973	p.L764
PIK3CA	3	178942488	178942489	p.L766F
PIK3CA	3	178947826	178947827	p.C901F
PIK3CA	3	178948043	178948044	p.D939G
PIK3CA	3	178951956	178951957	p.M1004I
PIK3CA	3	178951963	178951964	p.G1007R
PIK3CA	3	178952003	178952004	p.A1020V
PIK3CA	3	178952005	178952006	p.Y1021H
PIK3CA	3	178952017	178952018	p.T1025A
PIK3CA	3	178952053	178952054	p.E1037K
PIK3CA	3	178952062	178952063	p.M1040V
PIK3CA	3	178952073	178952074	p.M1043I
PIK3CA	3	178952074	178952075	p.N1044Y
PIK3CA	3	178952076	178952077	p.N1044K
PIK3CA	3	178952084	178952085	p.H1047R
PIK3CA	3	178952084	178952085	p.H1047L
PIK3CA	3	178952089	178952090	p.G1049R
PIK3R1	5	67586646	67586647	p.E31Q
PIK3R1	5	67588951	67588952	p.R348*
PIK3R1	5	67589138	67589139	p.G376R
PIK3R1	5	67589229	67589230	p.N406K
PIK3R1	5	67589268	67589269	p.K419
PIK3R1	5	67589555	67589556	p.D440G
PIK3R1	5	67589626	67589627	p.D464N
PIK3R1	5	67590466	67590467	p.E510V
PIK3R1	5	67590480	67590481	p.E515K
PIK3R1	5	67591082	67591083	p.I559T
PIK3R1	5	67591106	67591107	p.K567E
PIK3R1	5	67591128	67591129	p.R574I
PIK3R1	5	67592086	67592087	p.E635K
PIK3R1	5	67592109	67592110	p.R642P
PTCH1	9	98209594	98209595	p.P1315L
PTCH1	9	98232138	98232139	p.R602*
PTCH1	9	98241404	98241405	p.Q365*
PTCH1	9	98248146	98248147	p.R135R
PTCH1	9	98278971	98278972	p.E44G
PTEN	10	89624253	89624254	p.S10R
PTEN	10	89624270	89624272	p.Y15fs
PTEN	10	89624271	89624273	p.Y16fs
PTEN	10	89653839	89653840	p.Y46*
PTEN	10	89653841	89653842	p.N48fs
PTEN	10	89653843	89653844	p.N48fs
PTEN	10	89653844	89653845	p.N48I
PTEN	10	89685280	89685281	p.S59*
PTEN	10	89690809	89690811	p.E73fs
PTEN	10	89690809	89690813	p.E73fs
PTEN	10	89692747	89692785	p.F103fs
PTEN	10	89692779	89692780	p.Y88*
PTEN	10	89692793	89692794	p.H93L
d	10	89692830	89692831	p.C105W
PTEN	10	89692834	89692835	p.D107Y
PTEN	10	89692882	89692883	p.H123D
PTEN	10	89692899	89692900	p.K128N
PTEN	10	89692904	89692905	p.R130Q
PTEN	10	89692904	89692905	p.R130P
PTEN	10	89692919	89692920	p.I135K
PTEN	10	89711875	89711876	p.G165E
PTEN	10	89711880	89711881	p.T167A
PTEN	10	89711890	89711891	p.S170N
PTEN	10	89711890	89711891	p.S170I
PTEN	10	89711892	89711893	p.Q171*
PTEN	10	89711927	89711929	p.K183fs
PTEN	10	89717614	89717615	p.Q214*
PTEN	10	89717677	89717678	p.E235*
PTEN	10	89717726	89717737	p.D252fs
PTEN	10	89717741	89717743	p.F257fs
PTEN	10	89717770	89717771	p.K266*
PTEN	10	89720706	89720714	p.E288fs
PTEN	10	89720798	89720802	p.T319fs
PTEN	10	89720825	89720827	p.D326fs
RB1	13	48881487	48881489	p.A73fs
RB1	13	48916746	48916747	p.Q93*
RB1	13	48919243	48919244	p.E137*
RB1	13	48923147	48923148	p.L199*
RB1	13	48934188	48934189	p.S215*
RB1	13	48934188	48934189	p.S215*
RB1	13	48936988	48936989	p.R254fs
RB1	13	48941652	48941653	p.Y321*
RB1	13	48941690	48941691	p.R334K
RB1	13	48951122	48951123	NA
RB1	13	48953759	48953760	p.R455*
RB1	13	48954372	48954373	p.Y498
RB1	13	48955531	48955532	p.L550I
RB1	13	48955533	48955534	p.E551fs
RB1	13	48955537	48955538	p.R552*
RB1	13	49030342	49030343	p.Y606*
RB1	13	49033888	49033890	p.I679fs
RB1	13	49037902	49037903	p.K715*
RB1	13	49039163	49039164	p.E748*
RB1	13	49039422	49039430	p.I804fs
RB1	13	49039500	49039501	p.S829*
RB1	13	49050905	49050906	p.E864*
RB1	13	49050932	49050933	p.K873E
RET	10	43597800	43597801	p.P117T
RET	10	43601944	43601945	p.R330Q
RET	10	43607664	43607665	p.D547
RET	10	43609101	43609102	p.C620R
RET	10	43609955	43609956	p.T636
RET	10	43615074	43615075	p.G830A
RET	10	43615567	43615569	p.A883F
RET	10	43617415	43617416	p.M918T
RPTOR	17	78704421	78704422	p.S190
RPTOR	17	78704458	78704459	p.V203I
RPTOR	17	78811785	78811786	p.T401S
RPTOR	17	78831616	78831617	p.V476L
RPTOR	17	78857687	78857688	p.Q586H
RPTOR	17	78857700	78857701	p.A591P
RPTOR	17	78857733	78857734	p.E602K
RPTOR	17	78867560	78867561	p.S766T
RPTOR	17	78897382	78897383	p.P906
RPTOR	17	78923255	78923256	p.I1093M
RPTOR	17	78923267	78923268	p.K1097
RUNX1	21	36164659	36164660	p.L378fs
RUNX1	21	36164863	36164864	p.P337
RUNX1	21	36171615	36171616	p.L317F
RUNX1	21	36171622	36171624	p.S314fs
RUNX1	21	36171673	36171680	p.V296fs
RUNX1	21	36171699	36171715	p.S284fs
RUNX1	21	36171703	36171705	p.L288fs
RUNX1	21	36206715	36206716	p.Q266*
RUNX1	21	36206728	36206736	p.F259fs
RUNX1	21	36206752	36206753	p.L253
RUNX1	21	36206775	36206777	p.T245fs
RUNX1	21	36206844	36206861	p.S218fs
RUNX1	21	36231782	36231783	p.R201Q
RUNX1	21	36231750	36231751	p.G187
RUNX1	21	36231790	36231791	p.D198G
RUNX1	21	36231818	36231819	p.Y189H
RUNX1	21	36252855	36252857	p.R169fs
RUNX1	21	36252859	36252860	p.G168R
RUNX1	21	36252879	36252881	p.L161fs
RUNX1	21	36252879	36252880	p.L161P
RUNX1	21	36252945	36252946	p.N139S
RUNX1	21	36252957	36252958	p.G135D
RUNX1	21	36252989	36252990	p.P125fs
RUNX1	21	36252993	36252995	p.D123fs
RUNX1	21	36259156	36259157	p.L112fs
RUNX1	21	36259171	362591712	p.R107H
RUNX1	21	36259324	36259325	p.L56S
SMO	7	128845100	128845101	p.R199W
SMO	7	128846039	128846040	p.A324T
SMO	7	128846114	128846115	p.T349P
SMO	7	128846398	128846399	p.L412F
SMO	7	128848649	128848650	p.E439K
SMO	7	128850341	128850342	p.W535L
SMO	7	128850817	128850818	p.Q555
SMO	7	128851592	128851593	p.T640A
SMO	7	128852043	128852044	p.Q706*
STK11	19	1207007	1207008	p.T32T
STK11	19	1207020	1207021	p.Q37*
STK11	19	1207089	1207091	p.Y60fs
STK11	19	1218491	1218492	p.Q123*
STK11	19	1220381	1220382	p.Q159*
STK11	19	1220414	1220415	p.Q170*
STK11	19	1220487	1220488	p.D194V
STK11	19	1220493	1220494	p.G196V
STK11	19	1220501	1220502	p.E199K
STK11	19	1221263	1221267	p.F264fs*22
STK11	19	1221292	1221293	p.Y272Y
STK11	19	1221313	1221314	p.P281fs*6
STK11	19	1223058	1223059	p.W332*
STK11	19	1223124	1223125	p.F354L
TP53	17	7573930	7573931	p.S366A
TP53	17	7573960	7573961	p.G356W
TP53	17	7573965	7573966	p.Q354R
TP53	17	7573987	7573988	p.A347T
TP53	17	7574001	7574002	p.R342P
TP53	17	7574002	7574003	p.R342*
TP53	17	7574002	7574003	p.R342fs
TP53	17	7574011	7574012	NA
TP53	17	7574029	7574030	p.R333fs
TP53	17	7576854	7576855	p.Q331*
TP53	17	7576862	7576863	p.F328fs
TP53	17	7576884	7576895	p.P318fs
TP53	17	7576887	7576888	NA
TP53	17	7576923	7576925	p.L308fs
TP53	17	7577021	7577022	p.R306*
TP53	17	7577030	7577031	p.S303fs
TP53	17	7577050	7577079	p.E287fs
TP53	17	7577060	7577064	p.K292fs
TP53	17	7577066	7577085	p.E285fs
TP53	17	7577072	7577073	p.L289F
TP53	17	7577080	7577081	p.E286A
TP53	17	7577081	7577082	p.E286Q
TP53	17	7577081	7577082	p.E286K
TP53	17	7577084	7577085	p.E285K
TP53	17	7577093	7577094	p.R282G
TP53	17	7577093	7577094	p.R282W
TP53	17	7577095	7577096	p.D281V
TP53	17	7577098	7577099	p.R280T
TP53	17	7577099	7577100	p.R280*
TP53	17	7577101	7577102	p.G279E
TP53	17	7577104	7577105	p.P278L
TP53	17	7577105	7577106	p.P278A
TP53	17	7577105	7577106	p.P278T
TP53	17	7577106	7577116	p.C275fs
TP53	17	7577111	7577112	p.A276P
TP53	17	7577117	7577118	p.V274F
TP53	17	7577119	7577120	p.R273H
TP53	17	7577119	7577120	p.R273L
TP53	17	7577119	7577120	p.R273P
TP53	17	7577120	7577121	p.R273C
TP53	17	7577123	7577124	p.V272M
TP53	17	7577126	7577128	p.E270fs
TP53	17	7577128	7577129	p.F270S
TP53	17	7577129	7577130	p.F270I
TP53	17	7577140	7577141	p.G266E
TP53	17	7577143	7577144	p.L265P
TP53	17	7577143	7577144	p.L265R
TP53	17	7577152	7577153	p.G262V
TP53	17	7577508	7577509	p.E258*
TP53	17	7577508	7577509	p.E258Q
TP53	17	7577513	7577515	p.T256fs
TP53	17	7577516	7577517	p.I255S
TP53	17	7577516	7577517	p.I255N
TP53	17	7577517	7577518	p.I255F
TP53	17	7577525	7577526	p.L252P
TP53	17	7577530	7577531	p.I251fs
TP53	17	7577537	7577538	p.R248Q
TP53	17	7577538	7577539	p.R248W
TP53	17	7577540	7577541	p.N247I
TP53	17	7577542	7577543	p.M246I
TP53	17	7577546	7577547	p.G245D
TP53	17	7577547	7577548	p.G245S
TP53	17	7577556	7577557	p.S241fs
TP53	17	7577557	7577558	p.C242fs
TP53	17	7577558	7577559	p.S241C
TP53	17	7577565	7577567	p.N238fs
TP53	17	7577567	7577568	p.C238F
TP53	17	7577567	7577568	p.C238Y
TP53	17	7577579	7577580	p.Y234C
TP53	17	7577585	7577586	p.I232S
TP53	17	7578141	7578142	p.G197V
TP53	17	7578174	7578176	p.V186fs
TP53	17	7578187	7578188	p.E221*
TP53	17	7578189	7578190	p.Y220C
TP53	17	7578189	7578190	p.Y220S
TP53	17	7578190	7578191	p.Y220H
TP53	17	7578202	7578203	p.V216M
TP53	17	7578203	7578204	p.S215R
TP53	17	7578204	7578205	p.S215I
TP53	17	7578211	7578212	p.R213*
TP53	17	7578217	7578218	p.T211fs
TP53	17	7578221	7578223	p.R209fs
TP53	17	7578234	7578235	p.Y205C
TP53	17	7578235	7578236	p.Y205N
TP53	17	7578238	7578239	p.E204fs
TP53	17	7578245	7578247	p.L201fs
TP53	17	7578252	7578253	p.G199V
TP53	17	7578252	7578253	p.G199E
TP53	17	7578256	7578257	p.E198*
TP53	17	7578258	7578259	p.V197G
TP53	17	7578262	7578263	p.R196*
TP53	17	7578264	7578265	p.I195T
TP53	17	7578267	7578268	p.L194R
TP53	17	7578267	7578268	p.L194P
TP53	17	7578270	7578271	p.H193L
TP53	17	7578270	7578271	p.H193R
TP53	17	7578271	7578272	p.H193Y
TP53	17	7578273	7578274	NA
TP53	17	7578274	7578275	p.Q192*
TP53	17	7578277	7578279	p.P190fs
TP53	17	7578370	7578371	p.G187S
TP53	17	7578381	7578382	p.S183*
TP53	17	7578393	7578394	p.H179R
TP53	17	7578394	7578395	p.H179Y
TP53	17	7578401	7578402	p.C176*
TP53	17	7578402	7578403	p.C176F
TP53	17	7578403	7578404	p.C176G
TP53	17	7578405	7578406	p.R175H
TP53	17	7578408	7578437	p.Q165fs
TP53	17	7578412	7578413	p.V173L
TP53	17	7578412	7578413	p.V173L
TP53	17	7578412	7578413	p.V173M
TP53	17	7578415	7578419	p.E171fs
TP53	17	7578426	7578427	p.H168P
TP53	17	7578428	7578429	p.Q167fs
TP53	17	7578430	7578431	p.Q167*
TP53	17	7578436	7578437	p.Q165*
TP53	17	7578441	7578442	p.Y163C
TP53	17	7578445	7578447	p.I161fs
TP53	17	7578448	7578449	p.A161T
TP53	17	7578457	7578458	p.R158G
TP53	17	7578457	7578464	p.R156fs
TP53	17	7578459	7578460	p.V157G
TP53	17	7578459	7578461	p.V157fs
TP53	17	7578460	7578461	p.V157F
TP53	17	7578463	7578476	p.P152fs
TP53	17	7578464	7578465	p.T155
TP53	17	7578466	7578467	p.T155P
TP53	17	7578477	7578478	p.P151H
TP53	17	7578490	7578491	p.V147fs
TP53	17	7578502	7578518	p.A138fs
TP53	17	7578507	7578508	p.C141Y
TP53	17	7578508	7578509	p.C141R
TP53	17	7578523	7578524	p.Q136E
TP53	17	7578524	7578525	p.C135W
TP53	17	7578525	7578526	p.C135Y
TP53	17	7578531	7578532	p.M133K
TP53	17	7578533	7578534	p.K132N
TP53	17	7578534	7578535	p.K132T
TP53	17	7578535	7578536	p.K132E
TP53	17	7578537	7578538	p.N131fs
TP53	17	7578541	7578542	p.L130V
TP53	17	7578550	7578551	p.S127P
TP53	17	7578552	7578553	p.Y126C
TP53	17	7578553	7578554	p.Y126N
TP53	17	7579311	7579312	p.T125
TP53	17	7579314	7579315	p.C124*
TP53	17	7579320	7579322	p.V122fs
TP53	17	7579328	7579329	p.K120E
TP53	17	7579345	7579346	p.L114*
TP53	17	7579348	7579349	p.F113C
TP53	17	7579354	7579355	p.L111P
TP53	17	7579358	7579359	p.R110fs
TP53	17	7579358	7579360	p.R109fs
TP53	17	7579359	7579361	p.R110fs
TP53	17	7579359	7579364	p.G108fs
TP53	17	7579363	7579365	p.G108fs
TP53	17	7579363	7579364	p.G108fs
TP53	17	7579366	7579367	p.Y107C
TP53	17	7579367	7579368	p.Y107D
TP53	17	7579413	7579414	p.W91*
TP53	17	7579431	7579433	p.A86fs
TP53	17	7579436	7579437	p.A83fs
TP53	17	7579457	7579459	p.P76fs
TP53	17	7579520	7579521	p.E56*
TP53	17	7579527	7579528	p.W53*
TP53	17	7579705	7579706	p.N30fs
